# Supplementary material
Source: publisher figshare collection journal article supplement (https://sage.figshare.com/ndownloader/files/18209348)
Supplement: Supplementary file 1 [file 18209348]

Dear Editors:

We would like to submit the enclosed manuscript entitled “Effect of regional arterial infusion combined with early enteral nutrition on severe acute pancreatitis”, which we wish to be considered for publication in “Journal of International Medical Research”. No conflict of interest exists in the submission of this manuscript, and this manuscript is approved by all authors for publication. I would like to declare on behalf of my co-authors that the work described was original research that has not been published previously, and not under consideration for publication elsewhere, in whole or in part. All the authors listed have approved the manuscript that is enclosed.

In this work, we highlight the efficacy of regional arterial infusion combined with early enteral nutrition for severe acute pancreatitis. I hope this paper is suitable for “Journal of International Medical Research”.

We deeply appreciate your consideration of our manuscript, and we look forward to receiving comments from the reviewers. If you have any queries, please don't hesitate to contact us.

Thank you and best regards.

Yours sincerely,

Zhiqiang Du
